# Supplementary material for: Comparative Effects of Different Nutritional Supplements on Inflammation, Nutritional Status, and Clinical Outcomes in Colorectal Cancer Patients: A Systematic Review and Network Meta-Analysis
Source: MDPI journal article supplement (doi:10.3390/nu15122772), 2023-06-16
Supplement: s1 [file s1]

## Supplementary Tables

**Supplementary Table S1.** Search strategy to find potentially relevant articles for inclusion in the network meta-analysis.

| Database | Search strategies                                                                                                                                                                                                                                                                                                                                                                                                                                                                                                                                                                                                                                                                                                                                                                                                                                                             |
|----------|-------------------------------------------------------------------------------------------------------------------------------------------------------------------------------------------------------------------------------------------------------------------------------------------------------------------------------------------------------------------------------------------------------------------------------------------------------------------------------------------------------------------------------------------------------------------------------------------------------------------------------------------------------------------------------------------------------------------------------------------------------------------------------------------------------------------------------------------------------------------------------|
| PubMed   | #1 "Colorectal Neoplasms"[Mesh]                                                                                                                                                                                                                                                                                                                                                                                                                                                                                                                                                                                                                                                                                                                                                                                                                                               |
|          | #2 "Colorectal Neoplasms"[Title/Abstract] OR "Colorectal Cancer"[Title/Abstract] OR "Colorectal Cancers"[Title/Abstract] OR "Colorectal Carcinoma"[Title/Abstract] OR "Colorectal Carcinomas"[Title/Abstract] OR "Colorectal Neoplasm"[Title/Abstract] OR "Colorectal Tumor"[Title/Abstract] OR "Colorectal Tumors"[Title/Abstract]                                                                                                                                                                                                                                                                                                                                                                                                                                                                                                                                           |
|          | #3 #1 OR #2                                                                                                                                                                                                                                                                                                                                                                                                                                                                                                                                                                                                                                                                                                                                                                                                                                                                   |
|          | #4 "Glutamine"[Mesh]                                                                                                                                                                                                                                                                                                                                                                                                                                                                                                                                                                                                                                                                                                                                                                                                                                                          |
|          | #5 "Glutamine"[Title/Abstract] OR "L-Glutamine"[Title/Abstract] OR "L Glutamine"[Title/Abstract] OR "D-Glutamine"[Title/Abstract] OR "D Glutamine"[Title/Abstract]                                                                                                                                                                                                                                                                                                                                                                                                                                                                                                                                                                                                                                                                                                            |
|          | #6 #4 OR #5                                                                                                                                                                                                                                                                                                                                                                                                                                                                                                                                                                                                                                                                                                                                                                                                                                                                   |
|          | #7 "Arginine"[Mesh]                                                                                                                                                                                                                                                                                                                                                                                                                                                                                                                                                                                                                                                                                                                                                                                                                                                           |
|          | #8 "Arginine"[Title/Abstract] OR "DL-Arginine Acetate, Monohydrate"[Title/Abstract] OR "L-Arginine"[Title/Abstract] OR "L-Isomer Arginine"[Title/Abstract] OR "L Arginine"[Title/Abstract] OR "Monohydrate DL-Arginine Acetate"[Title/Abstract]                                                                                                                                                                                                                                                                                                                                                                                                                                                                                                                                                                                                                               |
|          | #9 #7 OR #8                                                                                                                                                                                                                                                                                                                                                                                                                                                                                                                                                                                                                                                                                                                                                                                                                                                                   |
|          | #10 "Fatty Acids, Omega-3"[Mesh]                                                                                                                                                                                                                                                                                                                                                                                                                                                                                                                                                                                                                                                                                                                                                                                                                                              |
|          | #11 "Fatty Acids, Omega-3"[Title/Abstract] OR "Fatty Acid, Omega-3"[Title/Abstract] OR "N 3 Fatty Acid"[Title/Abstract] OR "n 3 Fatty Acids"[Title/Abstract] OR "n 3 Oil"[Title/Abstract] OR "n 3 Oils"[Title/Abstract] OR "n 3 Polyunsaturated Fatty Acid"[Title/Abstract] OR "n 3 PUFA"[Title/Abstract] OR "N-3 Fatty Acid"[Title/Abstract] OR "n3 Fatty Acid"[Title/Abstract] OR "n-3 Fatty Acids"[Title/Abstract] OR "n-3 Oil"[Title/Abstract] OR "n-3 Oils"[Title/Abstract] OR "n3 Polyunsaturated Fatty Acid"[Title/Abstract] OR "n-3 Polyunsaturated Fatty Acid"[Title/Abstract] OR "n-3 PUFA"[Title/Abstract] OR "n3 PUFA"[Title/Abstract] OR "Omega 3 Fatty Acid"[Title/Abstract] OR "Omega 3 Fatty Acids"[Title/Abstract] OR "Omega-3 Fatty Acid"[Title/Abstract] OR "Omega-3 Fatty Acids"[Title/Abstract] OR "n3 Oils"[Title/Abstract] OR "n3 Oil"[Title/Abstract] |
|          | #12 #10 OR #11                                                                                                                                                                                                                                                                                                                                                                                                                                                                                                                                                                                                                                                                                                                                                                                                                                                                |
|          | #13 "Probiotics"[Mesh]                                                                                                                                                                                                                                                                                                                                                                                                                                                                                                                                                                                                                                                                                                                                                                                                                                                        |
|          | #14 "Probiotics"[Title/Abstract] OR "Probiotic"[Title/Abstract]                                                                                                                                                                                                                                                                                                                                                                                                                                                                                                                                                                                                                                                                                                                                                                                                               |
|          | #15 #13 OR #14                                                                                                                                                                                                                                                                                                                                                                                                                                                                                                                                                                                                                                                                                                                                                                                                                                                                |
|          | #16 "Vitamin D"[Mesh]                                                                                                                                                                                                                                                                                                                                                                                                                                                                                                                                                                                                                                                                                                                                                                                                                                                         |
|          | #17 "Vitamin D"[Title/Abstract] OR "25-OH-D"[Title/Abstract] OR "25-hydroxy Vitamin D"[Title/Abstract] OR "1, 25-dihydroxy Vitamin D"[Title/Abstract] OR "cholecalciferol"[Title/Abstract] OR "caldiol"[Title/Abstract] OR                                                                                                                                                                                                                                                                                                                                                                                                                                                                                                                                                                                                                                                    |

|                |                                                                                                                                                                                                                                                                                                                                                                                                                                                                                                                                                                                                                                        |
|----------------|----------------------------------------------------------------------------------------------------------------------------------------------------------------------------------------------------------------------------------------------------------------------------------------------------------------------------------------------------------------------------------------------------------------------------------------------------------------------------------------------------------------------------------------------------------------------------------------------------------------------------------------|
|                | "calcitriol"[Title/Abstract] OR "hydroxycholecalciferols"[Title/Abstract] OR "25-hydroxy Vitamin D3"[Title/Abstract]                                                                                                                                                                                                                                                                                                                                                                                                                                                                                                                   |
|                | #18 #16 OR #17                                                                                                                                                                                                                                                                                                                                                                                                                                                                                                                                                                                                                         |
|                | #19 #6 OR #9 OR #12 OR #15 OR #18                                                                                                                                                                                                                                                                                                                                                                                                                                                                                                                                                                                                      |
|                | #20 #3 AND #19                                                                                                                                                                                                                                                                                                                                                                                                                                                                                                                                                                                                                         |
| Web of Science | #1 Colorectal Neoplasms (Topic) OR Colorectal Cancer (Topic) OR Colorectal Cancers (Topic) OR Colorectal Carcinoma (Topic) OR Colorectal Carcinomas (Topic) OR Colorectal Neoplasm (Topic) OR Colorectal Tumor (Topic) OR Colorectal Tumors (Topic)                                                                                                                                                                                                                                                                                                                                                                                    |
|                | #2 Glutamine (Topic) OR L-Glutamine (Topic) OR L Glutamine (Topic) OR D-Glutamine (Topic) OR D Glutamine (Topic)                                                                                                                                                                                                                                                                                                                                                                                                                                                                                                                       |
|                | #3 Arginine (Topic) OR DL-Arginine Acetate, Monohydrate (Topic) OR L-Arginine (Topic) OR L-Isomer Arginine (Topic) OR L Arginine (Topic) OR Monohydrate DL-Arginine Acetate (Topic)                                                                                                                                                                                                                                                                                                                                                                                                                                                    |
|                | #4 Fatty Acids, Omega-3 (Topic) OR Fatty Acid, Omega-3 (Topic) OR N 3 Fatty Acid (Topic) OR n 3 Fatty Acids (Topic) OR n 3 Oil (Topic) OR n 3 Oils (Topic) OR n 3 Polyunsaturated Fatty Acid (Topic) OR n 3 PUFA (Topic) OR N-3 Fatty Acid (Topic) OR n3 Fatty Acid (Topic) OR n-3 Fatty Acids (Topic) OR n-3 Oil (Topic) OR n-3 Oils (Topic) OR n3 Polyunsaturated Fatty Acid (Topic) OR n-3 Polyunsaturated Fatty Acid (Topic) OR n-3 PUFA (Topic) OR n3 PUFA (Topic) OR Omega 3 Fatty Acid (Topic) OR Omega 3 Fatty Acids (Topic) OR Omega-3 Fatty Acid (Topic) OR Omega-3 Fatty Acids (Topic) OR n3 Oils (Topic) OR n3 Oil (Topic) |
|                | #5 Probiotics (Topic) OR Probiotic (Topic)                                                                                                                                                                                                                                                                                                                                                                                                                                                                                                                                                                                             |
|                | #6 Vitamin D (Topic) OR 25-OH-D (Topic) OR 25-hydroxy Vitamin D (Topic) OR 1, 25-dihydroxy Vitamin D (Topic) OR cholecalciferol (Topic) OR calcidiol (Topic) OR calcitriol (Topic) OR hydroxycholecalciferols (Topic) OR 25-hydroxy Vitamin D <sub>3</sub> (Topic)                                                                                                                                                                                                                                                                                                                                                                     |
|                | #7 #6 OR #5 OR #4 OR #3 OR #2                                                                                                                                                                                                                                                                                                                                                                                                                                                                                                                                                                                                          |
|                | #8 #7 AND #1                                                                                                                                                                                                                                                                                                                                                                                                                                                                                                                                                                                                                           |
| Embase         | #1 'colorectal cancer'/exp OR 'colorectal tumor'/exp                                                                                                                                                                                                                                                                                                                                                                                                                                                                                                                                                                                   |
|                | #2 'colorectal cancer':ti,ab OR 'colo-rectal cancer':ti,ab OR 'colo-rectal carcinogenesis':ti,ab OR 'colo-rectal malignancies':ti,ab OR 'colo-rectal malignancy':ti,ab OR 'colorectal cancerogenesis':ti,ab OR 'colorectal carcinogenesis':ti,ab OR 'colorectal malignancies':ti,ab OR 'colorectal malignancy':ti,ab OR 'recto-colonic cancer':ti,ab OR 'rectocolonic cancer':ti,ab OR 'colorectal tumor':ti,ab OR 'colorectal neoplasia':ti,ab OR 'colorectal neoplasm':ti,ab OR 'colorectal neoplasms':ti,ab OR 'colorectal tumorigenesis':ti,ab OR 'colorectal tumour':ti,ab OR 'neoplastic colorectal':ti,ab                       |
|                | #3 #1 OR #2                                                                                                                                                                                                                                                                                                                                                                                                                                                                                                                                                                                                                            |
|                | #4 'glutamine'/exp                                                                                                                                                                                                                                                                                                                                                                                                                                                                                                                                                                                                                     |
|                | #5 'glutamine':ti,ab OR '2 aminoglutaramic acid':ti,ab OR '2, 5 diamino 5 oxopentanoic acid':ti,ab OR 'acutil':ti,ab OR 'adamin g':ti,ab OR 'endar':ti,ab OR 'glumin':ti,ab OR 'glutamic acid 5 amide':ti,ab OR 'glutamic acid monoamide':ti,ab OR 'glutamin':ti,ab OR 'levoglutamide':ti,ab OR 'levoglutamine':ti,ab OR 'nutrestore':ti,ab OR 'xyndari':ti,ab OR '2 amino 4                                                                                                                                                                                                                                                           |

|                |                                                                                                                                                                                                                                                                                                                                            |
|----------------|--------------------------------------------------------------------------------------------------------------------------------------------------------------------------------------------------------------------------------------------------------------------------------------------------------------------------------------------|
|                | carbamoylbutanoic acid':ti,ab                                                                                                                                                                                                                                                                                                              |
|                | #6 #4 OR #5                                                                                                                                                                                                                                                                                                                                |
|                | #7 'arginine'/exp                                                                                                                                                                                                                                                                                                                          |
|                | #8 'arginine':ti,ab OR 'arg':ti,ab OR 'arginin':ti,ab OR 'arginyl residue':ti,ab OR 'argivene':ti,ab OR 'bioarginina':ti,ab OR 'l a 60 45':ti,ab OR 'l arginine':ti,ab OR 'r gene 10':ti,ab OR 'r-gene 10':ti,ab OR '2 amino 5 guanidinovaleric acid':ti,ab                                                                                |
|                | #9 #7 OR #8                                                                                                                                                                                                                                                                                                                                |
|                | #10 'omega 3 fatty acid'/exp                                                                                                                                                                                                                                                                                                               |
|                | #11 'omega 3 fatty acid':ti,ab OR 'eicosa e':ti,ab OR 'eicosapen':ti,ab OR 'epaisdin':ti,ab OR 'epanova':ti,ab OR 'n 3 fatty acid':ti,ab OR 'n 3 polyunsaturated fatty acid':ti,ab OR 'omega 3*':ti,ab OR 'omega forte':ti,ab OR 'omega-3-carboxylic acids':ti,ab OR 'sakana':ti,ab OR 'sanhelios omega 3':ti,ab OR 'bilantin omega':ti,ab |
|                | #12 #10 OR #11                                                                                                                                                                                                                                                                                                                             |
|                | #13 'probiotic agent'/exp                                                                                                                                                                                                                                                                                                                  |
|                | #14 'probiotic agent':ti,ab OR 'probiotic':ti,ab OR 'probiotics':ti,ab                                                                                                                                                                                                                                                                     |
|                | #15 #13 OR #14                                                                                                                                                                                                                                                                                                                             |
|                | #16 'vitamin d'/exp                                                                                                                                                                                                                                                                                                                        |
|                | #17 'vitamin d':ti,ab OR '25-oh-d':ti,ab OR '25-hydroxy vitamin d':ti,ab OR '1, 25-dihydroxy vitamin d':ti,ab OR 'cholecalciferol':ti,ab OR 'calcidiol':ti,ab OR 'calcitriol':ti,ab OR 'hydroxycholecalciferols':ti,ab OR '25-hydroxy vitamin d3':ti,ab                                                                                    |
|                | #18 #16 OR #17                                                                                                                                                                                                                                                                                                                             |
|                | #19 #6 OR #9 OR #12 OR #15 OR #18                                                                                                                                                                                                                                                                                                          |
|                | #20 #3 AND #19                                                                                                                                                                                                                                                                                                                             |
| The<br>Library | #1 MeSH descriptor: [Colorectal Neoplasms] explode all trees                                                                                                                                                                                                                                                                               |
|                | #2 (Colorectal Neoplasms):ti,ab,kw OR (Colorectal Cancer):ti,ab,kw OR (Colorectal Cancers):ti,ab,kw OR (Colorectal Carcinoma):ti,ab,kw OR (Colorectal Carcinomas):ti,ab,kw OR (Colorectal Neoplasm):ti,ab,kw OR (Colorectal Tumor):ti,ab,kw OR (Colorectal Tumors):ti,ab,kw                                                                |
|                | #3 #1 OR #2                                                                                                                                                                                                                                                                                                                                |
|                | #4 MeSH descriptor: [Glutamine] explode all trees                                                                                                                                                                                                                                                                                          |
|                | #5 (Glutamine):ti,ab,kw OR (L-Glutamine):ti,ab,kw OR (L Glutamine):ti,ab,kw OR (D-Glutamine):ti,ab,kw OR (D Glutamine):ti,ab,kw                                                                                                                                                                                                            |
|                | #6 #4 OR #5                                                                                                                                                                                                                                                                                                                                |
|                | #7 MeSH descriptor: [Arginine] explode all trees                                                                                                                                                                                                                                                                                           |
|                | #8 (Arginine):ti,ab,kw OR (DL-Arginine Acetate, Monohydrate):ti,ab,kw OR (L-Arginine):ti,ab,kw OR (L-Isomer Arginine):ti,ab,kw OR (L Arginine):ti,ab,kw OR (Monohydrate DL-Arginine Acetate):ti,ab,kw                                                                                                                                      |

|                                                                                                                                                                                                                                                                                                                                                                                                                                                                                                                                                                                                                                                                                                              |
|--------------------------------------------------------------------------------------------------------------------------------------------------------------------------------------------------------------------------------------------------------------------------------------------------------------------------------------------------------------------------------------------------------------------------------------------------------------------------------------------------------------------------------------------------------------------------------------------------------------------------------------------------------------------------------------------------------------|
| #9 #7 OR #8                                                                                                                                                                                                                                                                                                                                                                                                                                                                                                                                                                                                                                                                                                  |
| #10 MeSH descriptor: [Fatty Acids, Omega-3] explode all trees                                                                                                                                                                                                                                                                                                                                                                                                                                                                                                                                                                                                                                                |
| #11 (Fatty Acids, Omega-3):ti,ab,kw OR (Fatty Acid, Omega-3):ti,ab,kw OR (N 3 Fatty Acid):ti,ab,kw OR (n 3 Fatty Acids):ti,ab,kw OR (n 3 Oil):ti,ab,kw OR (n 3 Oils):ti,ab,kw OR (n 3 Polyunsaturated Fatty Acid):ti,ab,kw OR (n 3 PUFA):ti,ab,kw OR (N-3 Fatty Acid):ti,ab,kw OR (n3 Fatty Acid):ti,ab,kw OR (n-3 Fatty Acids):ti,ab,kw OR (n-3 Oil):ti,ab,kw OR (n-3 Oils):ti,ab,kw OR (n3 Polyunsaturated Fatty Acid):ti,ab,kw OR (n-3 Polyunsaturated Fatty Acid):ti,ab,kw OR (n-3 PUFA):ti,ab,kw OR (n3 PUFA):ti,ab,kw OR (Omega 3 Fatty Acid):ti,ab,kw OR (Omega 3 Fatty Acids):ti,ab,kw OR (Omega-3 Fatty Acid):ti,ab,kw OR (Omega-3 Fatty Acids):ti,ab,kw OR (n3 Oils):ti,ab,kw OR (n3 Oil):ti,ab,kw |
| #12 #10 OR #11                                                                                                                                                                                                                                                                                                                                                                                                                                                                                                                                                                                                                                                                                               |
| #13 MeSH descriptor: [Probiotics] explode all trees                                                                                                                                                                                                                                                                                                                                                                                                                                                                                                                                                                                                                                                          |
| #14 (Probiotics):ti,ab,kw OR (Probiotic):ti,ab,kw                                                                                                                                                                                                                                                                                                                                                                                                                                                                                                                                                                                                                                                            |
| #15 #13 OR #14                                                                                                                                                                                                                                                                                                                                                                                                                                                                                                                                                                                                                                                                                               |
| #16 MeSH descriptor: [Vitamin D] explode all trees                                                                                                                                                                                                                                                                                                                                                                                                                                                                                                                                                                                                                                                           |
| #17 (Vitamin D):ti,ab,kw OR (cholecalciferol):ti,ab,kw OR (calcidiol):ti,ab,kw OR (calcitriol):ti,ab,kw OR (hydroxycholecalciferols):ti,ab,kw                                                                                                                                                                                                                                                                                                                                                                                                                                                                                                                                                                |
| #18 #16 OR #17                                                                                                                                                                                                                                                                                                                                                                                                                                                                                                                                                                                                                                                                                               |
| #19 #6 OR #9 OR #12 OR #15 OR #18                                                                                                                                                                                                                                                                                                                                                                                                                                                                                                                                                                                                                                                                            |
| #19 AND #3                                                                                                                                                                                                                                                                                                                                                                                                                                                                                                                                                                                                                                                                                                   |

**Supplementary Table S2** League table: Nutritional supplements network meta-analysis results for C-reactive protein (CRP, mg/l).

|                         |                        |                        |                       |                        |                       |                     |         |
|-------------------------|------------------------|------------------------|-----------------------|------------------------|-----------------------|---------------------|---------|
| vitamind                |                        |                        |                       |                        |                       |                     |         |
| -15.11 (-69.87, 39.99)  | omega3 + vitamind      |                        |                       |                        |                       |                     |         |
| -27.18 (-99.47, 42.44)  | -12 (-78.55, 51.2)     | arginine               |                       |                        |                       |                     |         |
| -34.39 (-88.54, 20.71)  | -19.27 (-65.28, 26.79) | -7.24 (-55.66, 45)     | omega3                |                        |                       |                     |         |
| -35.17 (-96.4, 27.94)   | -20.29 (-74.16, 35.97) | -8.43 (-58.19, 48.28)  | -1.19 (-37.36, 37.59) | probiotics             |                       |                     |         |
| -43.12 (-111.97, 23.29) | -27.95 (-91.03, 31.16) | -15.87 (-75.78, 43.6)  | -8.23 (-56.99, 35.48) | -6.93 (-60.46, 38.4)   | glutamine             |                     |         |
| -47.1 (-115.36, 18.52)  | -31.92 (-94.27, 26.95) | -19.77 (-79.31, 39.15) | -11.9 (-60.53, 31)    | -10.45 (-63.78, 33.78) | -3.95 (-59.46, 52.04) | omega3 + probiotics |         |
| -46.34 (-102.68, 8.33)  | -31.26 (-79.47, 14.38) | -19 (-63.66, 25.48)    | -11.47 (-37.21, 9.53) | -10.04 (-43.3, 15.11)  | -3.08 (-42.83, 36.69) | 0.83 (-38.6, 40.09) | placebo |

Notes: estimates are presented as mean difference (MD) and 95% credible intervals (CrI; in parentheses). Comparisons between treatments should be read from left to right. The estimate of supplementation effectiveness is located at the intersection of the column-defining supplementation and the

row-defining supplementation. Significant results were presented in bold. Combined with omega-3 fatty acids and probiotics: omega3 + probiotics; combined with omega-3 fatty acids and vitamin D: omega3 + vitmind; omega-3 fatty acids: omega3; vitamin D: vitamind.

**Supplementary Table S3** League table: Nutritional supplements network meta-analysis results for nutritional indicators. (A) albumin (Alb, g/l); (B) weight (kg); (C) body mass index (BMI, kg/m<sup>2</sup>).

(A)

|                     |                     |                     |                    |         |
|---------------------|---------------------|---------------------|--------------------|---------|
| omega3 + vitamind   |                     |                     |                    |         |
| 2.01 (−9.21, 13.18) | vitamind            |                     |                    |         |
| 2.57 (−7.3, 12.88)  | 0.56 (−9.6, 11.21)  | omega3              |                    |         |
| 4.37 (−7.28, 16.84) | 2.37 (−9.53, 15.14) | 1.78 (−7.03, 11.05) | probiotics         |         |
| 5.3 (−4.51, 15.96)  | 3.3 (−6.89, 14.25)  | 2.7 (−3.47, 9.33)   | 0.92 (−5.43, 7.31) | placebo |

Notes: estimates are presented as mean difference (MD) and 95% credible intervals (CrI; in parentheses). Comparisons between treatments should be read from left to right. The estimate of supplementation effectiveness is located at the intersection of the column-defining supplementation and the row-defining supplementation. Significant results were presented in bold. Combined with omega-3 fatty acids and vitamin D: omega3 + vitmind; omega-3 fatty acids: omega3; vitamin D: vitamind.

(B)

|                      |                    |                      |                      |                     |                     |         |
|----------------------|--------------------|----------------------|----------------------|---------------------|---------------------|---------|
| omega3 + vitamind    |                    |                      |                      |                     |                     |         |
| 0.45 (−5.87, 6.83)   | omega3             |                      |                      |                     |                     |         |
| 1.01 (−6.27, 8.36)   | 0.54 (−6.21, 7.27) | vitamind             |                      |                     |                     |         |
| 1.93 (−10.23, 13.92) | 1.5 (−9.29, 12.1)  | 0.93 (−11.56, 13.16) | glutamine            |                     |                     |         |
| 2.2 (−6.03, 10.56)   | 1.76 (−4.3, 7.91)  | 1.22 (−7.29, 9.86)   | 0.31 (−10.99, 11.77) | omega3 + probiotics |                     |         |
| 3.08 (−7.05, 13.04)  | 2.58 (−5.8, 10.95) | 2.04 (−8.23, 12.49)  | 1.15 (−11.68, 14.02) | 0.83 (−8.45, 10.11) | probiotics          |         |
| 2.44 (−4.01, 8.94)   | 1.95 (−1.3, 5.4)   | 1.45 (−5.38, 8.28)   | 0.5 (−9.58, 10.72)   | 0.21 (−4.91, 5.32)  | −0.61 (−8.34, 7.16) | placebo |

Notes: estimates are presented as mean difference (MD) and 95% credible intervals (CrI; in parentheses). Comparisons between treatments should be read from left to right. The estimate of supplementation effectiveness is located at the intersection of the column-defining supplementation and the row-defining supplementation. Significant results were presented in bold. Combined with omega-3 fatty acids and probiotics: omega3 + probiotics; combined with omega-3 fatty acids and vitamin D: omega3 + vitmind; omega-3 fatty acids: omega3; vitamin D: vitamind.

(C)

|                    |                    |                    |                     |                    |         |
|--------------------|--------------------|--------------------|---------------------|--------------------|---------|
| omega3 + vitamind  |                    |                    |                     |                    |         |
| 0.11 (−2.05, 2.27) | omega3             |                    |                     |                    |         |
| 0.2 (−2.27, 2.69)  | 0.09 (−2.12, 2.31) | vitamind           |                     |                    |         |
| 0.85 (−4.62, 6.43) | 0.71 (−4.45, 6.03) | 0.66 (−4.87, 6.28) | omega3 + probiotics |                    |         |
| 0.7 (−2.83, 4.28)  | 0.6 (−2.43, 3.68)  | 0.52 (−3.09, 4.11) | −0.12 (−6, 5.54)    | probiotics         |         |
| 0.9 (−1.27, 3.1)   | 0.78 (−0.41, 2.05) | 0.7 (−1.53, 2.96)  | 0.07 (−5.1, 5.04)   | 0.19 (−2.63, 2.97) | placebo |

Notes: estimates are presented as mean difference (MD) and 95% credible intervals (CrI; in parentheses). Comparisons between treatments should be read from left to right. The estimate of supplementation effectiveness is located at the intersection of the column-defining supplementation and the row-defining supplementation. Significant results were presented in bold. Combined with omega-3 fatty acids and probiotics: omega3 + probiotics; combined with omega-3 fatty acids and vitamin D: omega3 + vitamind; omega-3 fatty acids: omega3; vitamin D: vitamind.

**Supplementary Table S4** League table: Nutritional supplements network meta-analysis results for clinical outcomes. (A) the incidence of urinary tract infections (UTI); (B) the incidence of anastomotic leaks (AL).

(A)

|                    |                    |                    |                    |        |
|--------------------|--------------------|--------------------|--------------------|--------|
| probiotics         |                    |                    |                    |        |
| 0.51 (0.01, 23.92) | omega3 + arginine  |                    |                    |        |
| 0.31 (0.05, 1.6)   | 0.62 (0.02, 18.84) | placebo            |                    |        |
| 0.21 (0, 8.98)     | 0.41 (0, 53.29)    | 0.68 (0.02, 20.47) | glutamine          |        |
| 0.14 (0.01, 2.56)  | 0.27 (0, 18.63)    | 0.45 (0.04, 5.11)  | 0.65 (0.01, 49.99) | omega3 |

Notes: estimates are presented as risk ratio (RR) and 95% credible intervals (CrI; in parentheses). Comparisons between treatments should be read from left to right. The estimate of supplementation effectiveness is located at the intersection of the column-defining supplementation and the row-defining supplementation. . Combined with omega-3 fatty acids and arginine: omega3 + arginine; omega-3 fatty acids: omega3.

(B)

|                 |                    |                   |                   |        |
|-----------------|--------------------|-------------------|-------------------|--------|
| glutamine       |                    |                   |                   |        |
| 0.35 (0, 21.57) | omega3 + arginine  |                   |                   |        |
| 0.26 (0, 7.63)  | 0.72 (0.05, 14.14) | probiotics        |                   |        |
| 0.17 (0, 3.66)  | 0.47 (0.03, 6.4)   | 0.66 (0.2, 1.54)  | placebo           |        |
| 0.04 (0, 1.27)  | 0.11 (0, 2.31)     | 0.15 (0.01, 1.08) | 0.24 (0.02, 1.44) | omega3 |

Notes: estimates are presented as risk ratio (RR) and 95% credible intervals (CrI; in parentheses). Comparisons between treatments should be read from left to right. The estimate of supplementation effectiveness is located at the intersection of the column-defining supplementation and the

row-defining supplementation. . Combined with omega-3 fatty acids and arginine: omega3 + arginine; omega-3 fatty acids: omega3.

**Supplementary Table S5** SUCRA values of nutritional supplements according to inflammatory indicators.

| Outcomes      | Rank       | 1                | 2                 | 3                  | 4         | 5                 | 6                  | 7                  | 8       |
|---------------|------------|------------------|-------------------|--------------------|-----------|-------------------|--------------------|--------------------|---------|
| TNF- $\alpha$ | Supplement | Glutamine        | Probiotics        | Omega-3+vitamin D  | Vitamin D | Omega-3           | Omega-3+Probiotics | Placebo            |         |
|               | SUCRA (%)  | 99.9             | 83.3              | 51.0               | 42.9      | 31.1              | 28.1               | 13.7               |         |
| IL-6          | Supplement | Omega-3+Arginine | Probiotics        | Omega-3+Probiotics | Vitamin D | Omega-3+Vitamin D | Glutamine          | Omega-3            | Placebo |
|               | SUCRA (%)  | 98.6             | 75.8              | 44.5               | 41.9      | 40.4              | 35.7               | 32.4               | 30.7    |
| CRP           | Supplement | Vitamin D        | Omega-3+Vitamin D | Arginine           | Omega-3   | Probiotics        | Glutamine          | Omega-3+Probiotics | Placebo |
|               | SUCRA (%)  | 87.2             | 74.6              | 60.5               | 51.4      | 49.3              | 32.7               | 23.3               | 20.9    |

Note: omega-3 fatty acids: omega-3.

**Supplementary Table S6** SUCRA values of nutritional supplements according to nutritional indicators.

| Outcomes | Rank       | 1                 | 2         | 3         | 4                  | 5                  | 6          | 7       |
|----------|------------|-------------------|-----------|-----------|--------------------|--------------------|------------|---------|
| Albumin  | Supplement | Omega-3+Vitamin D | Vitamin D | Omega-3   | Probiotics         | Placebo            |            |         |
|          | SUCRA (%)  | 76.9              | 58.0      | 56.1      | 37.0               | 22.1               |            |         |
| Weight   | Supplement | Omega-3+Vitamin D | Omega-3   | Vitamin D | Glutamine          | Omega-3+Probiotics | Probiotics | Placebo |
|          | SUCRA (%)  | 66.6              | 66.5      | 55.3      | 47.4               | 42.1               | 36.3       | 35.7    |
| BMI      | Supplement | Omega-3+Vitamin D | Omega-3   | Vitamin D | Omega-3+Probiotics | Probiotics         | Placebo    |         |
|          | SUCRA (%)  | 63.6              | 63.4      | 56.9      | 43.7               | 42.8               | 29.6       |         |

Note: omega-3 fatty acids: omega-3.

**Supplementary Table S7** SUCRA values of nutritional supplements according to clinical outcomes.

| Outcomes                                 | Rank       | 1          | 2                | 3                 | 4               | 5          | 6       | 7 |
|------------------------------------------|------------|------------|------------------|-------------------|-----------------|------------|---------|---|
| the length of hospital stay              | Supplement | Glutamine  | Omega-3          | Omega-3+Glutamine | Omega3+Arginine | Probiotics | Placebo |   |
|                                          | SUCRA (%)  | 78.7       | 71.1             | 58.5              | 56.1            | 31.5       | 4.0     |   |
| the incidence of urinary tract infection | Supplement | Probiotics | Omega-3+Arginine | Placebo           | Glutamine       | Omega-3    |         |   |
|                                          | SUCRA (%)  | 83.5       | 59.9             | 45.3              | 37.5            | 23.8       |         |   |

|                                    |                      |                 |                       |                       |              |              |
|------------------------------------|----------------------|-----------------|-----------------------|-----------------------|--------------|--------------|
| the incidence of wound infections  | Supplement SUCRA (%) | Glutamine 94.5  | Probiotics 60.6       | Omega-3+Arginine 54.6 | Placebo 21.0 | Omega-3 19.4 |
| the incidence of anastomotic leaks | Supplement SUCRA (%) | Glutamine 84.1  | Omega-3+Arginine 64.5 | Probiotics 60.2       | Placebo 36.6 | Omega-3 4.5  |
| the incidence of pneumonia         | Supplement SUCRA (%) | Probiotics 82.0 | Glutamine 69.1        | Placebo 34.5          | Omega-3 14.5 |              |

Note: omega-3 fatty acids: omega-3.

## Supplementary Figures

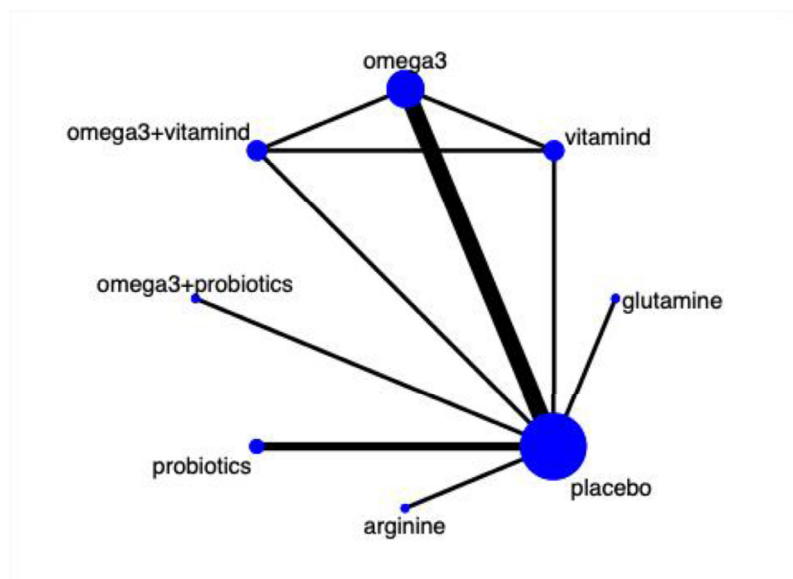

**Supplementary Figure S1** Network plots for C-reactive protein (CRP, mg/l).



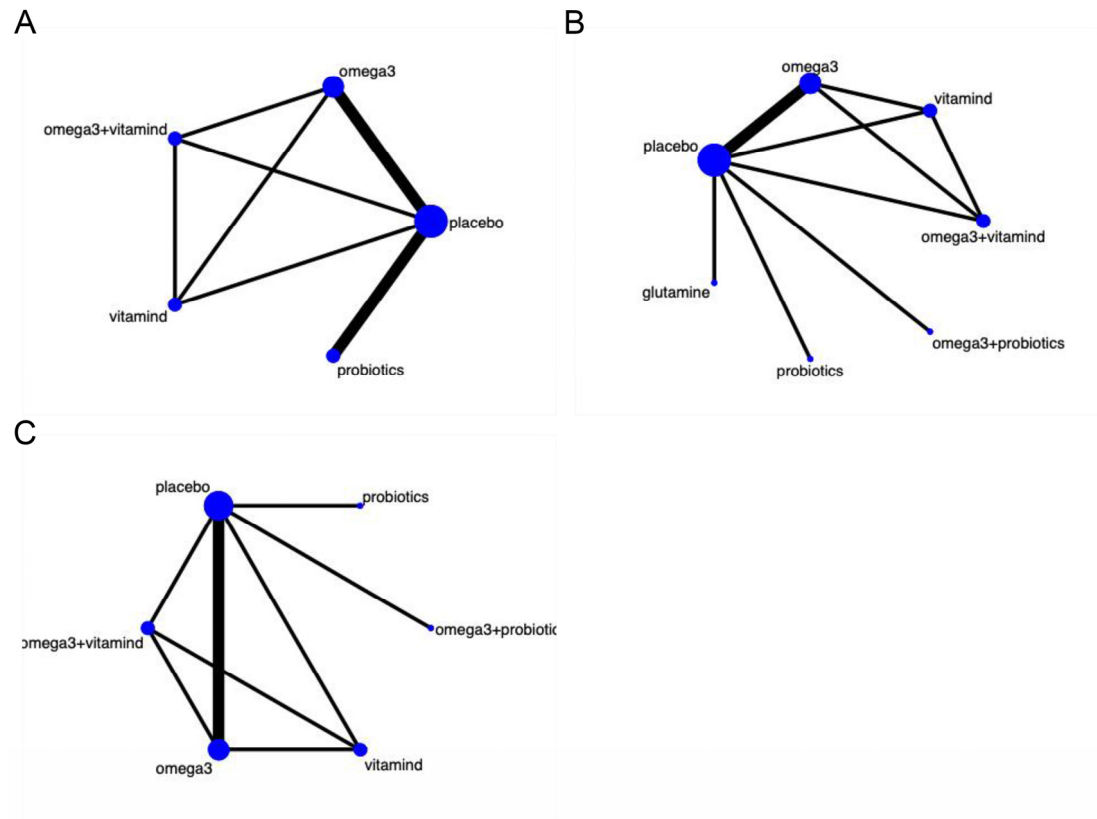

**Supplementary Figure S2** Network plots for nutritional indicators. (A) albumin (Alb, g/l); (B) weight (kg); (C) body mass index (BMI, kg/m<sup>2</sup>).
